# Supplementary material for: New thieno[3,2-b][1]benzothiophene-based organic sensitizers containing π-extended thiophene spacers for efficient dye-sensitized solar cells
Source: Royal Society of Chemistry journal article supplement (doi:10.1039/c5ra15100g), 2015-01-01
Supplement: c5ra15100g1.pdf [file c5ra15100g1.pdf]

## Electronic Supplementary Information (ESI)

for

### New Thieno[3,2-*b*][1]benzothiophene-Based Organic Sensitizers Containing $\pi$ -Extended Thiophene Spacers for Efficient Dye-Sensitized Solar Cells

Yu Kyung Eom<sup>a</sup>, Sung Ho Kang<sup>a</sup>, In Taek Choi<sup>a</sup>, Eunji Kim<sup>b</sup>, Jeongho Kim<sup>b</sup>, Myung Jong Ju<sup>a</sup> and Hwan Kyu Kim<sup>a,\*</sup>

<sup>a</sup>*Global GET-Future Lab. & Department of Advanced Materials Chemistry, Korea University, 2511 Sejong-ro, Sejong 339-700, Korea, E-mail: [hkk777@korea.ac.kr](mailto:hkk777@korea.ac.kr)*

<sup>b</sup>*Department of Chemistry, Inha University, 100 Inha-ro, Incheon 402-751, Korea*

Electronic supplementary information (ESI) available. See DOI:

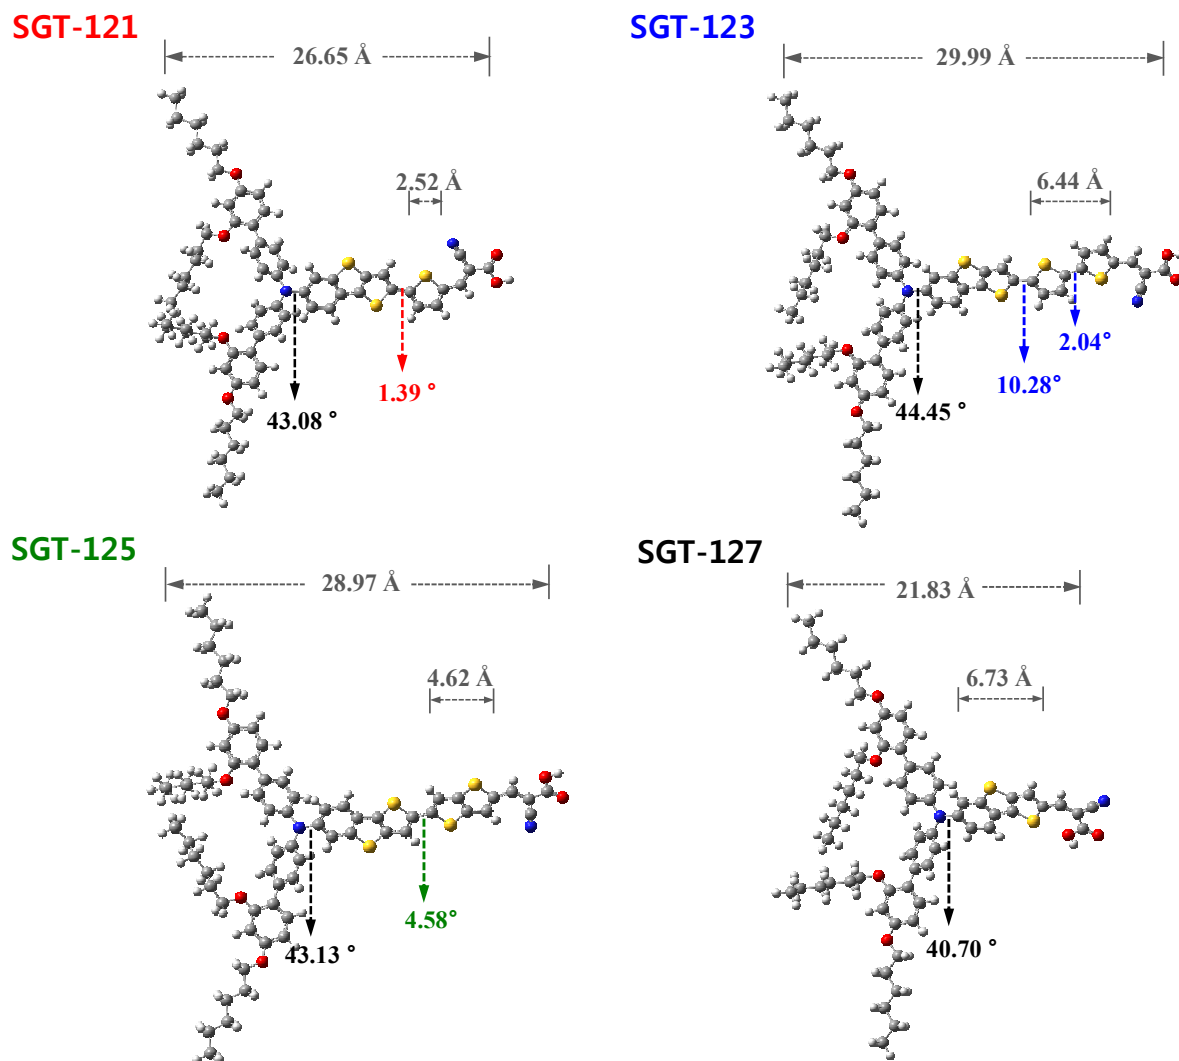

**Figure S1.** Dihedral angles, total lengths and  $\pi$ -spacer lengths for all sensitizers.

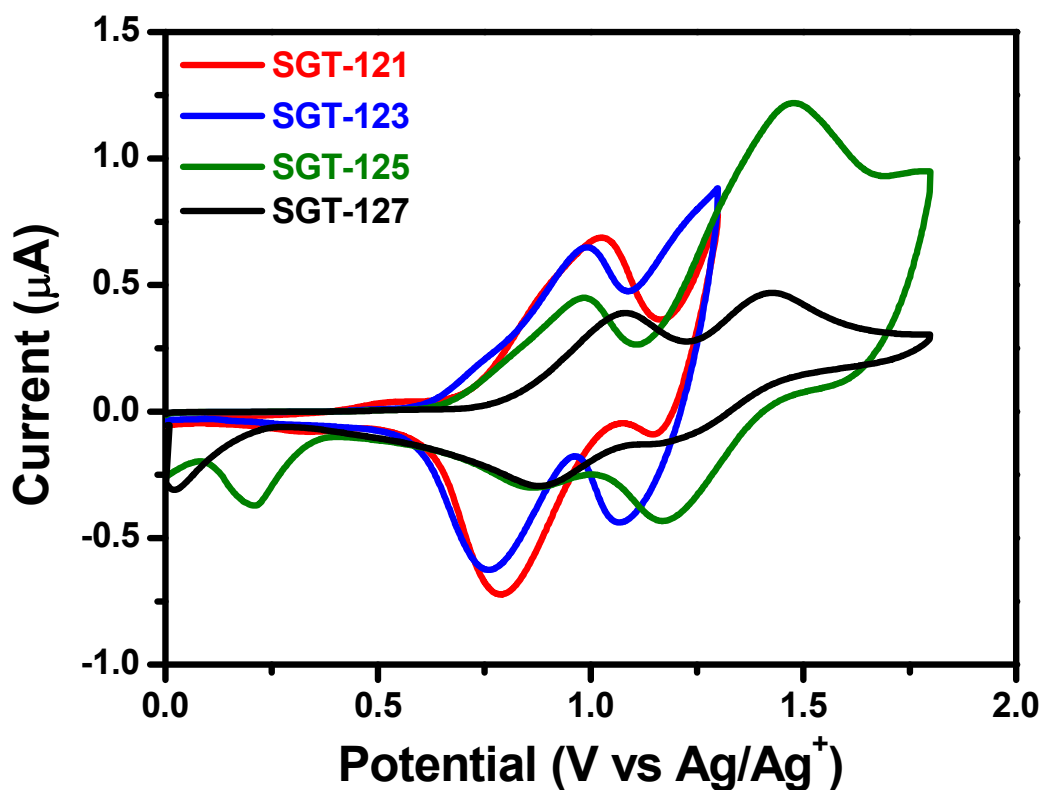

**Figure S2.** Cyclic voltammograms measured with the dye-coated TiO<sub>2</sub> films.

The oxidation potentials of dyes on TiO<sub>2</sub> were measured in CH<sub>3</sub>CN with 0.1 M tetra-*n*-butylammonium hexafluorophosphate (TBAPF<sub>6</sub>) as the inert electrolyte, using a three-electrode system (e.g. dye-coated TiO<sub>2</sub> film as the working electrode, Pt wire as the counter electrode and Ag/Ag<sup>+</sup> as the reference electrode). The potential of the reference electrode was calibrated with Fc/Fc<sup>+</sup> as an external reference using  $E_0(\text{Fc}/\text{Fc}^+) = 0.63 \text{ V vs. NHE}$ .

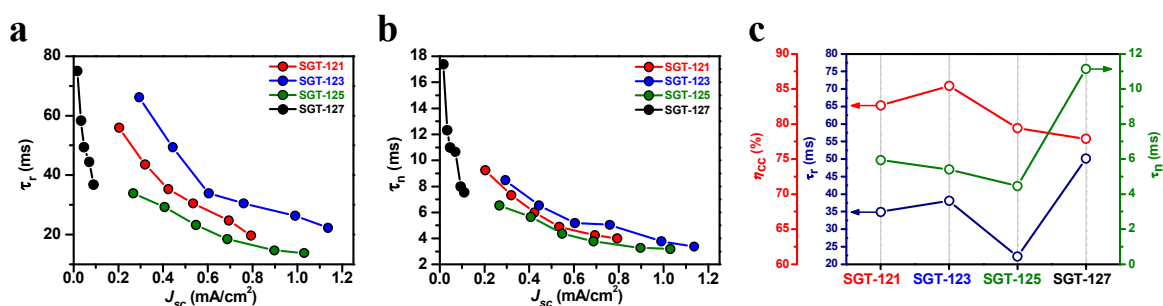

**Figure S3.**  $\tau_r$  (a) and  $\tau_n$  (b) values derived from IMVS and IMPS of the DSSCs as a function of light intensity, respectively. (c) The  $\eta_{cc}$  values obtained from IMVS and IMPS measurements for the same DSSCs.

To again prove the electron transport and recombination of the SGT sensitizer-based DSSCs, IMVS and IMPS measurements were performed. The electron-transport time ( $\tau_n$ ) or recombination time ( $\tau_r$ ) can be calculated from the expression,  $\tau_n$  or  $\tau_r = 1/2\pi f_{n \text{ or } r}$ , where  $f_n$  or  $f_r$  is the characteristic frequency minimum in the Nyquist plots of the IMVS and IMPS results.

**Figures S3a and S3b** show the  $\tau_r$  and  $\tau_n$  curves as a function of light intensity. The  $\tau_r$  values from IMVS were in the order of **SGT-125 < SGT-121 < SGT-123**, which is in agreement with the EIS measurements, which led to the higher  $V_{oc}$  of the **SGT-123**-based DSSC. The  $\tau_r$  and  $\tau_n$  values for the **SGT-127**-based DSSC were incommensurable with those of other sensitizers, owing to the weak light intensity. The  $\eta_{cc}$  results under different light intensities for all DSSCs are displayed in **Figure S3c**, which are also consistent with the  $\eta_{cc}$  values obtained from EIS results.

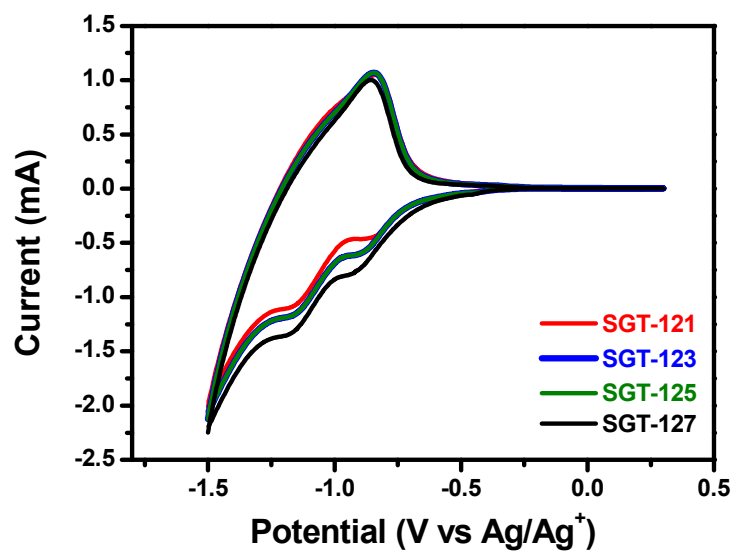

**Figure S4.** Cyclic voltammograms obtained with the dye-coated TiO<sub>2</sub> electrodes in 0.1 M LiClO<sub>4</sub> dissolved in acetonitrile at a scan rate of 50 mV s<sup>-1</sup> at room temperature

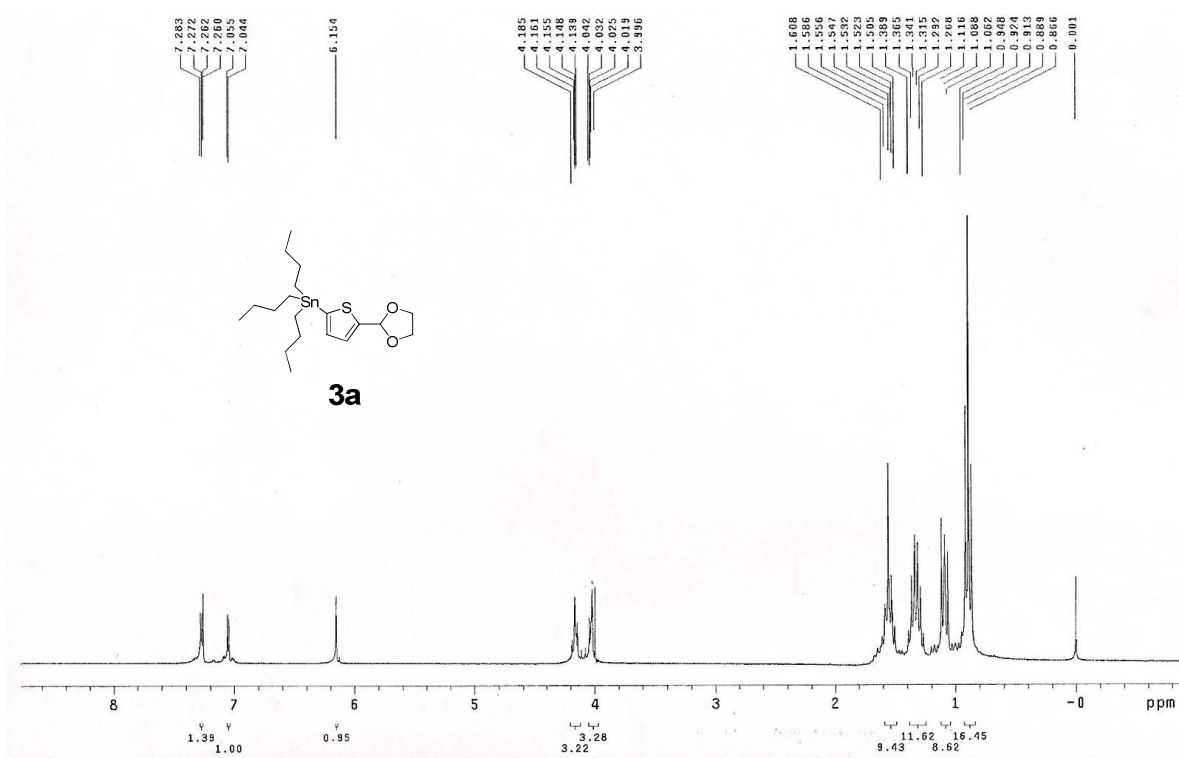

Figure S5. <sup>1</sup>H NMR spectrum of compound 3a in CDCl<sub>3</sub>

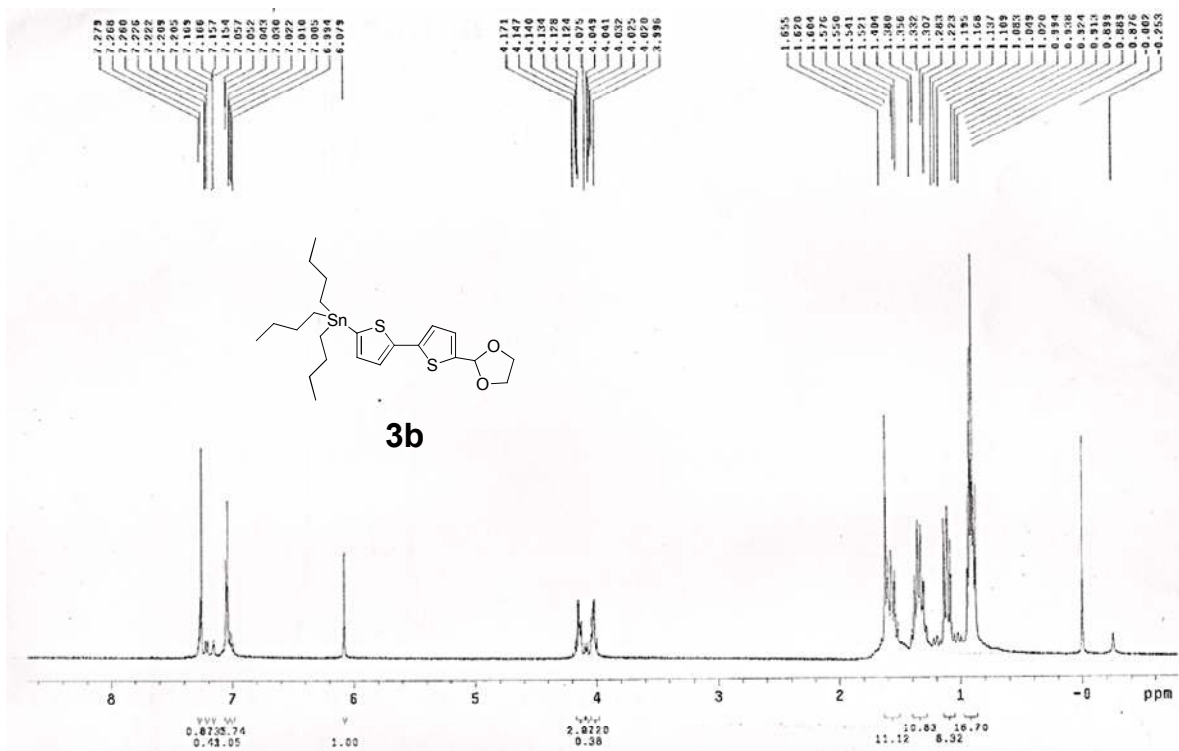

Figure S6. <sup>1</sup>H NMR spectrum of compound 3b in CDCl<sub>3</sub>

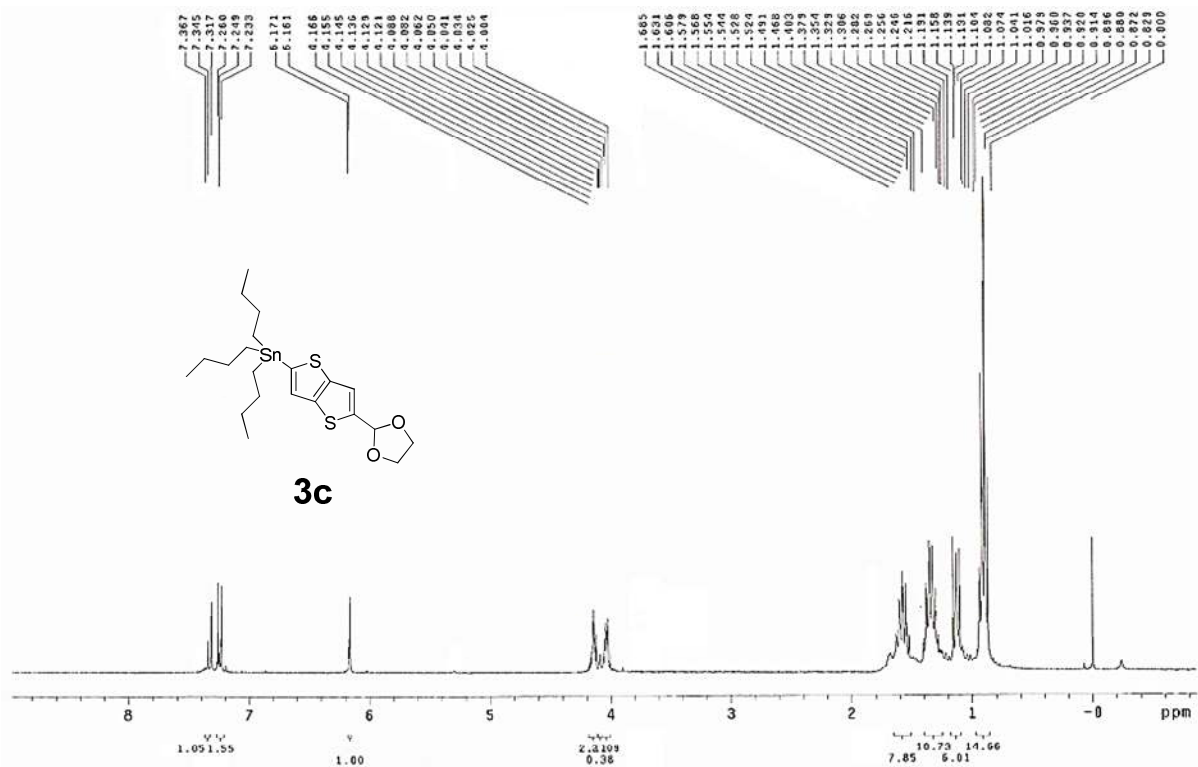

Figure S7. <sup>1</sup>H NMR spectrum of compound 3c in CDCl<sub>3</sub>

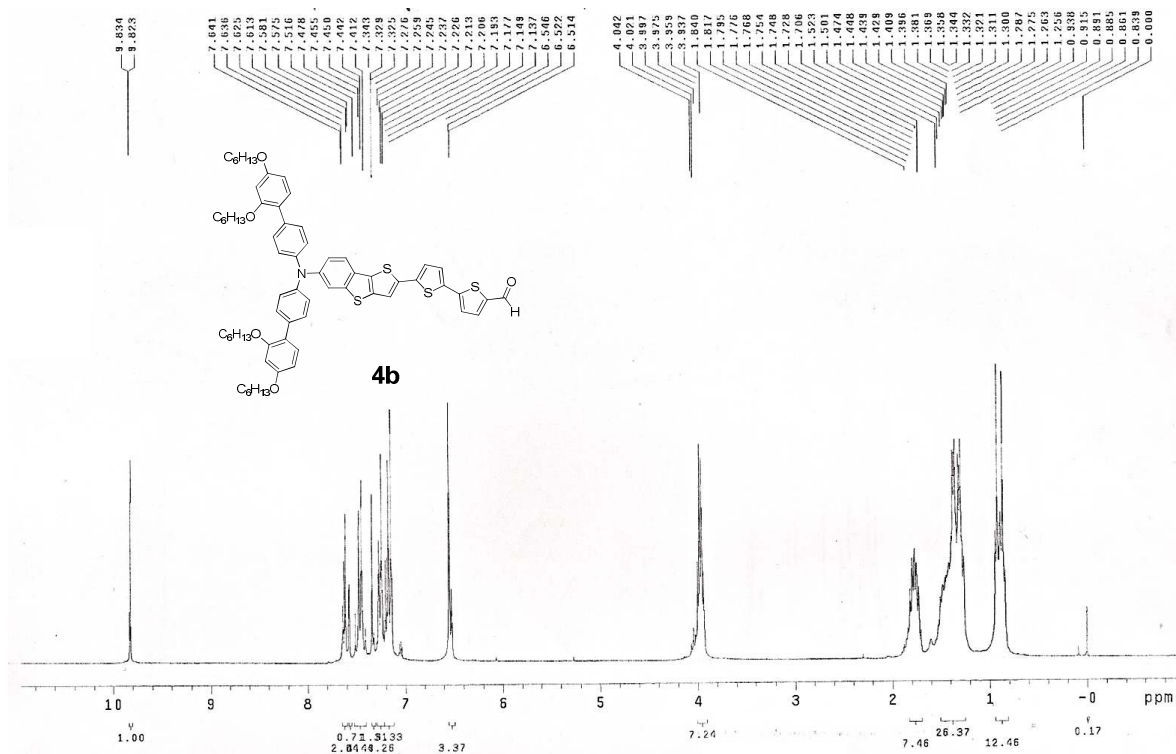

Figure S8. <sup>1</sup>H NMR spectrum of compound 4b in CDCl<sub>3</sub>

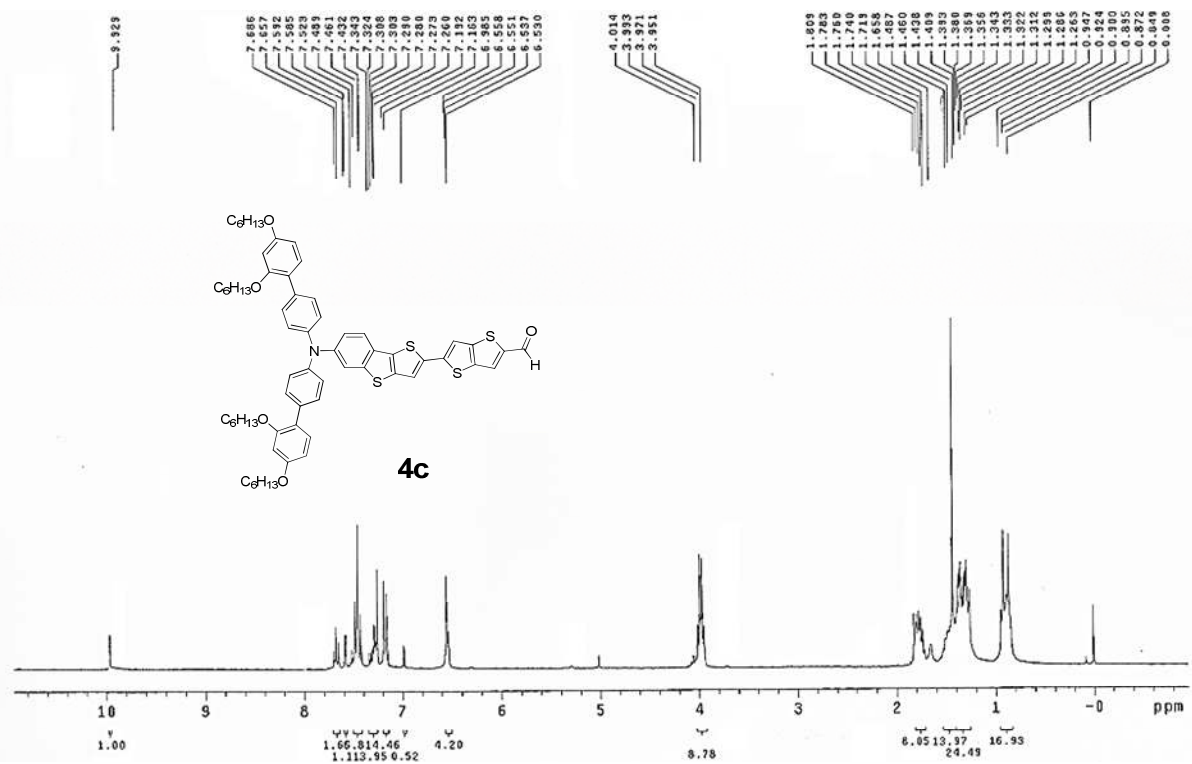

**Figure S9.**  $^1\text{H}$  NMR spectrum of compound **4c** in  $\text{CDCl}_3$

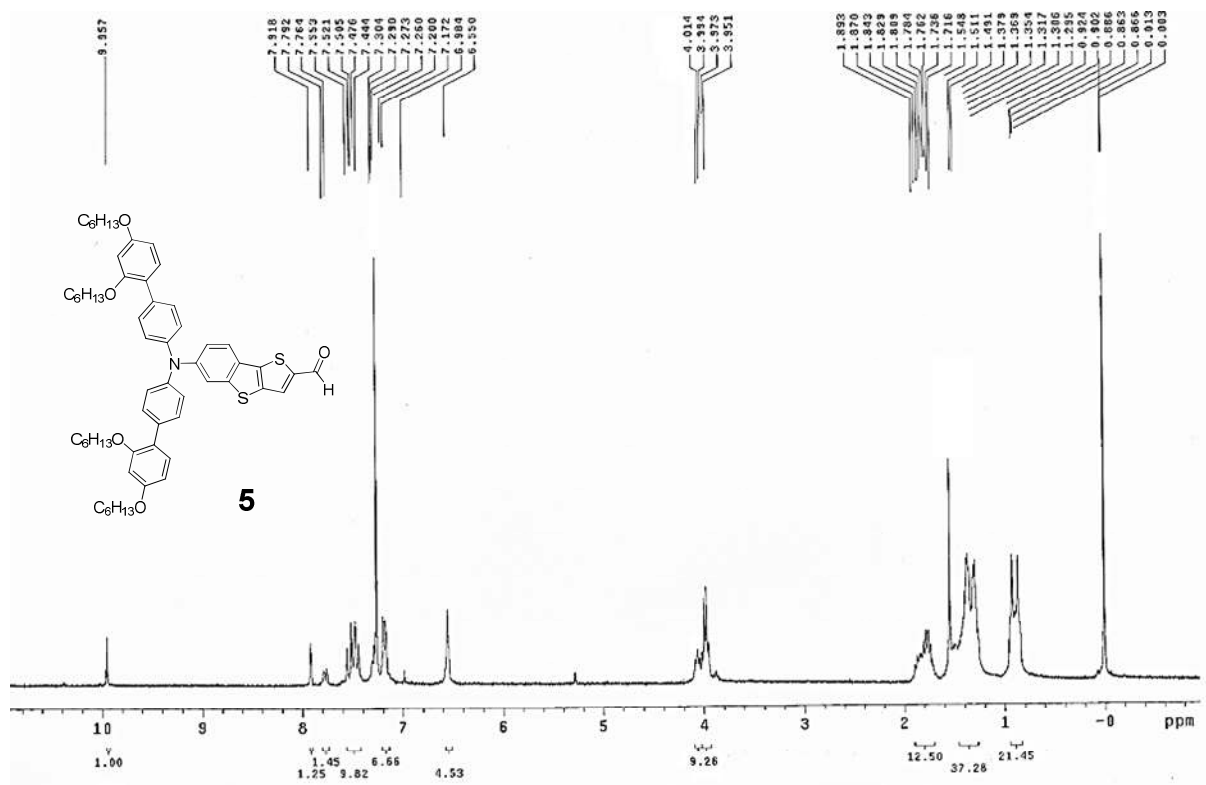

**Figure S10.**  $^1\text{H}$  NMR spectrum of compound **5** in  $\text{CDCl}_3$



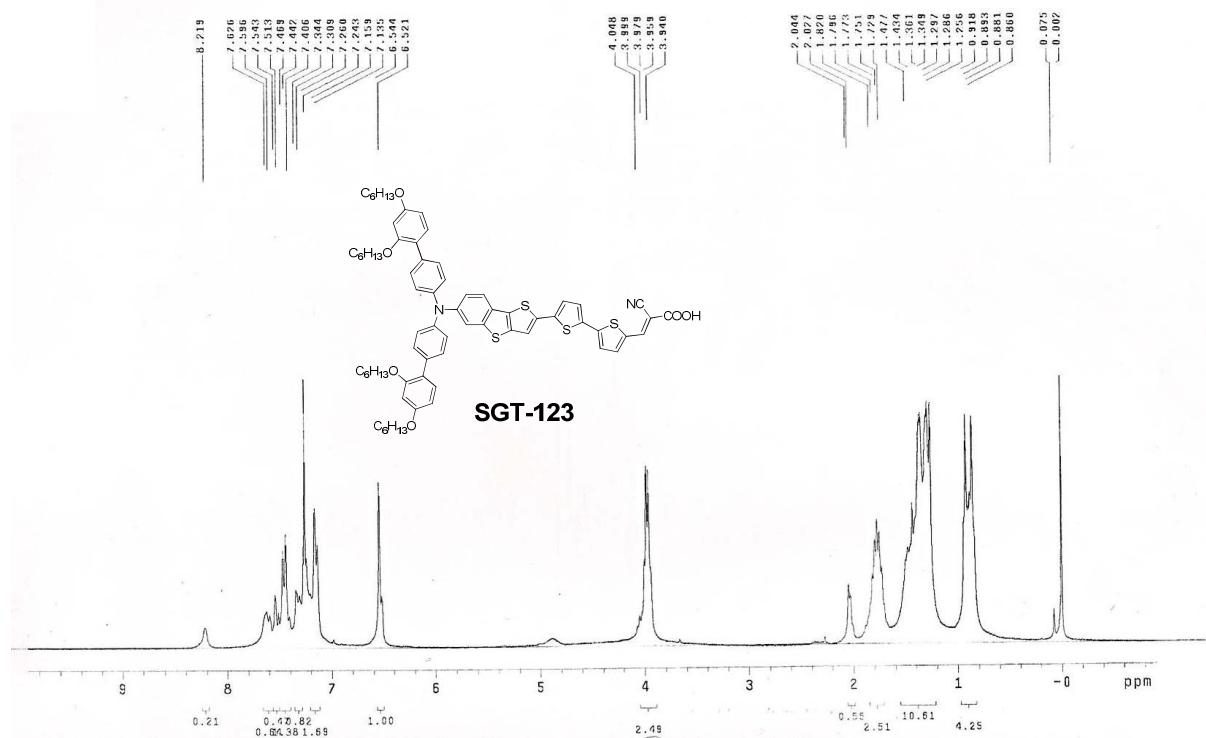

Figure S11.  $^1\text{H}$  NMR spectrum of SGT-123 in  $\text{CDCl}_3$

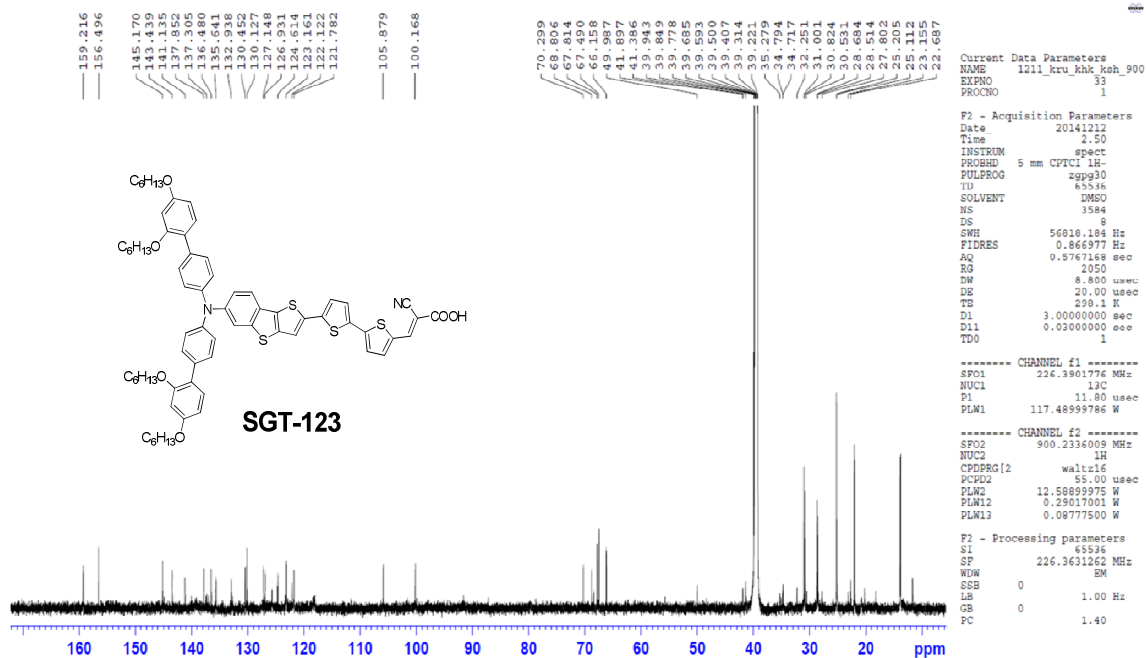

Figure S12.  $^{13}\text{C}$  NMR spectrum of SGT-123 in  $\text{DMSO}-d_6$

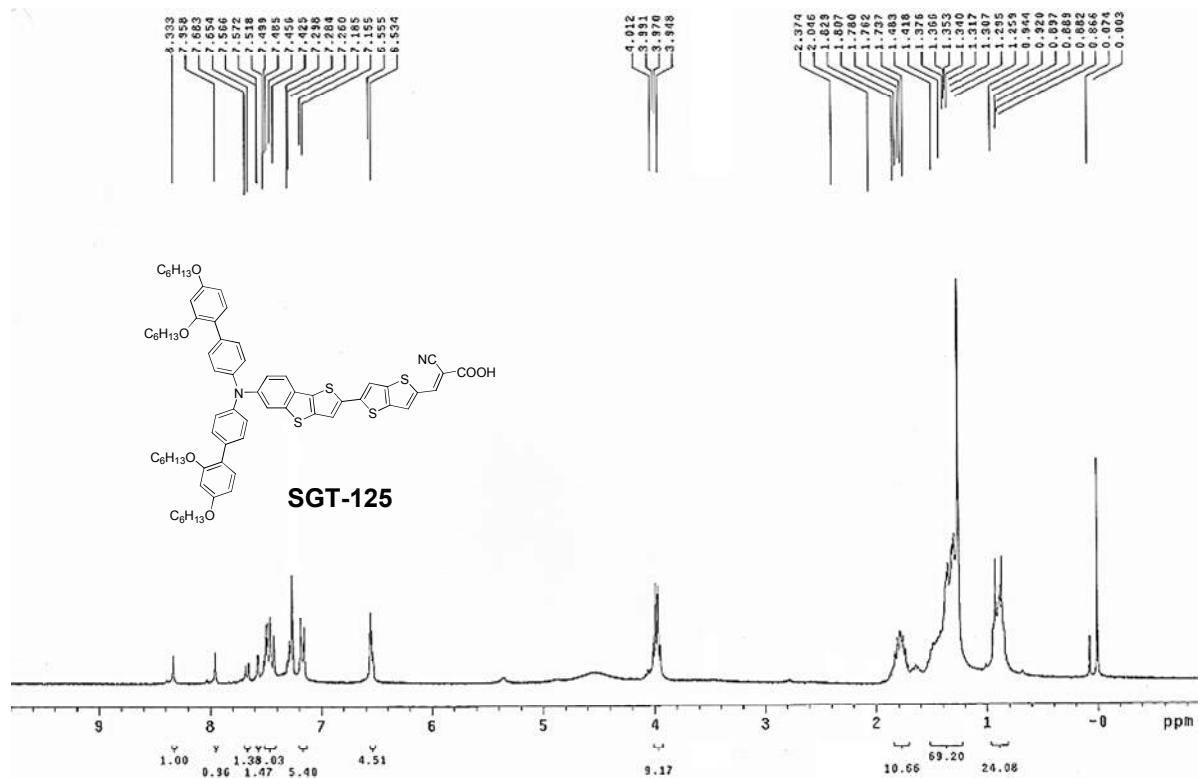

**Figure S13. <sup>1</sup>H NMR spectrum of SGT-125 in CDCl<sub>3</sub>**

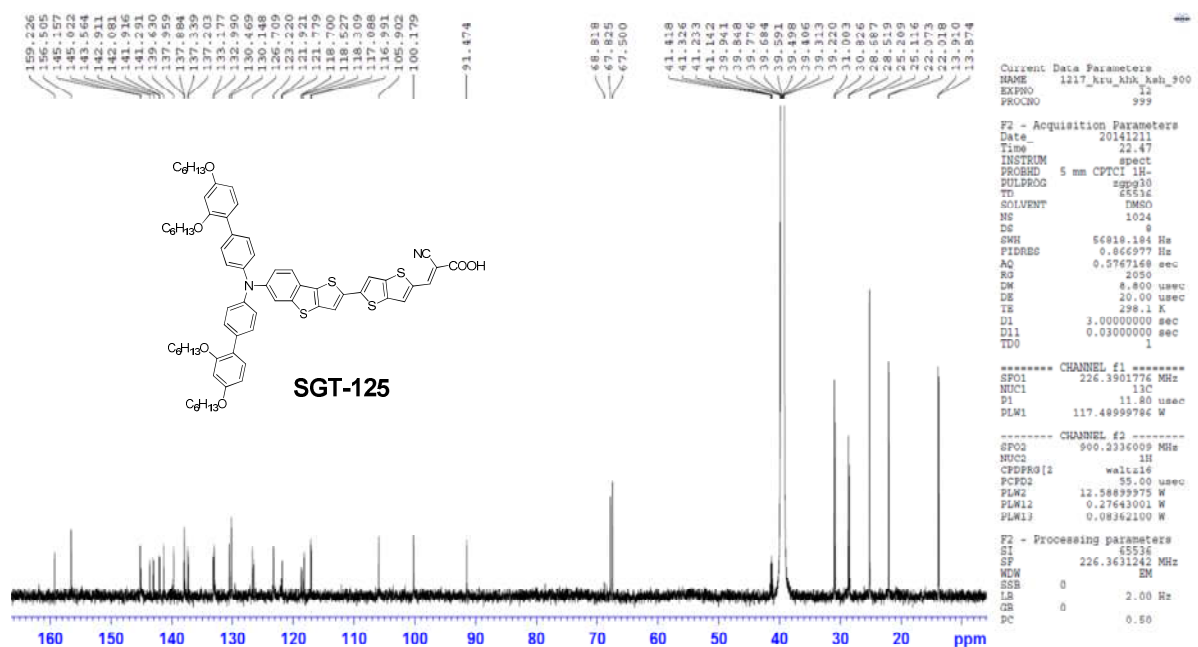

**Figure S14. <sup>1</sup>H NMR spectrum of SGT-125 in DMSO-*d*<sub>6</sub>**

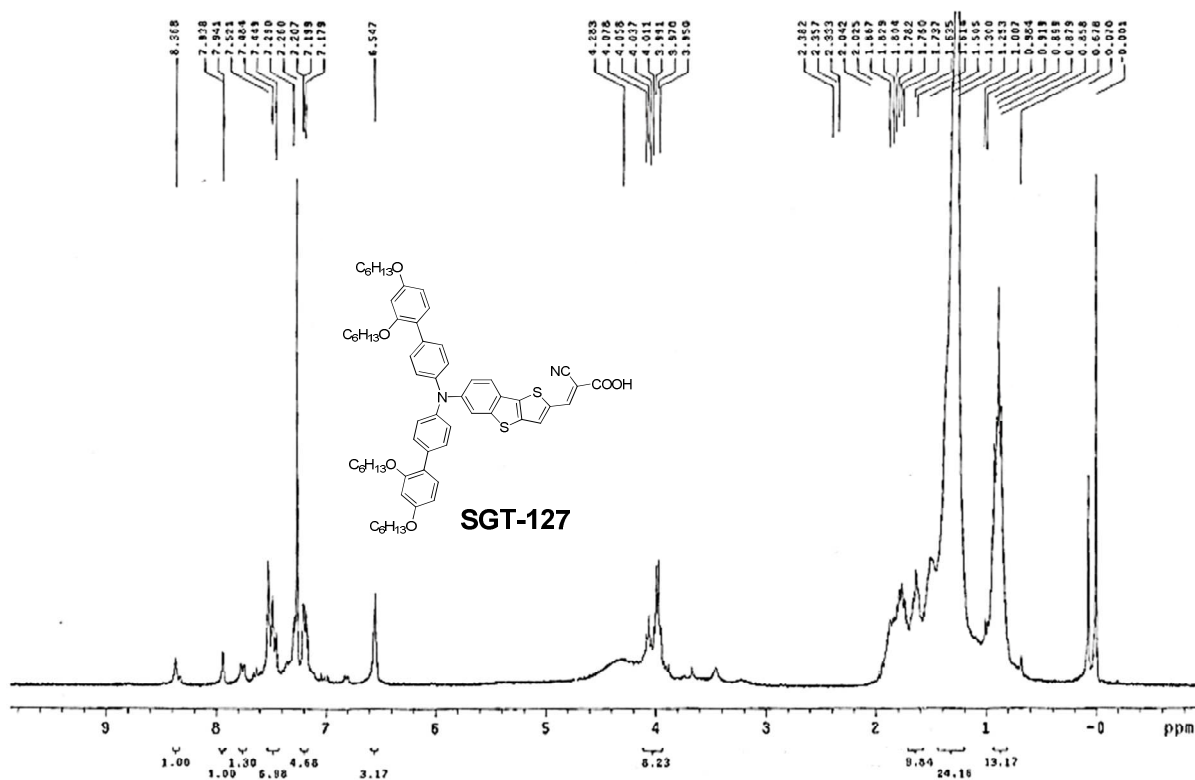

Figure S15. <sup>1</sup>H NMR spectrum of SGT-127 in CDCl<sub>3</sub>

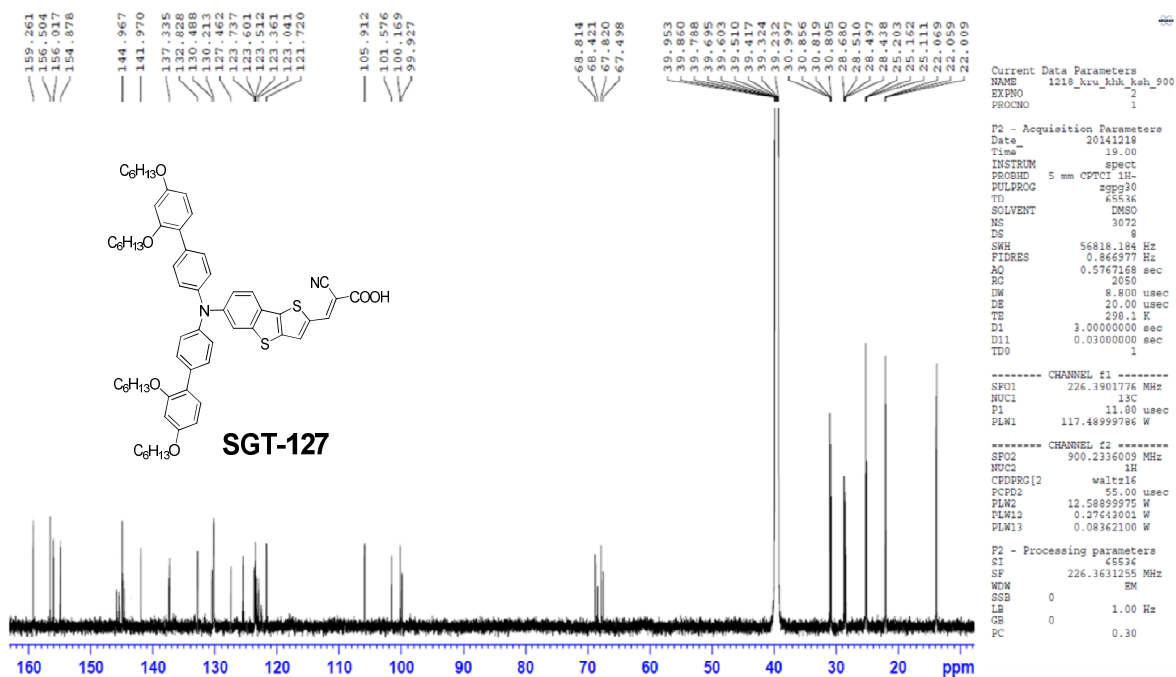

Figure S16. <sup>13</sup>C NMR spectrum of SGT-127 in DMSO-*d*<sub>6</sub>

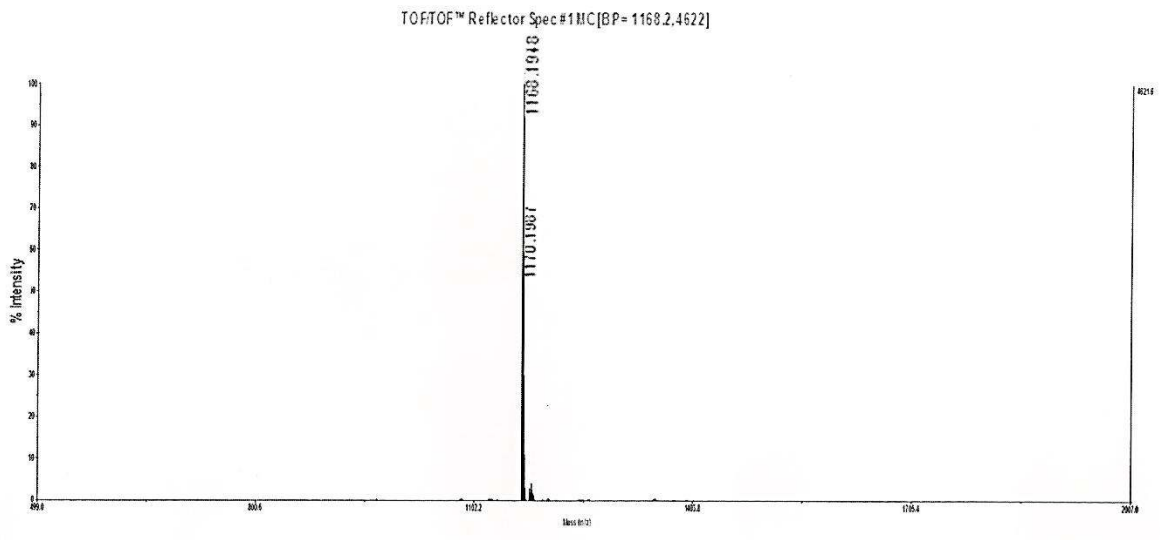

**Figure S17.** MALDI-TOF spectrum of **SGT-123**

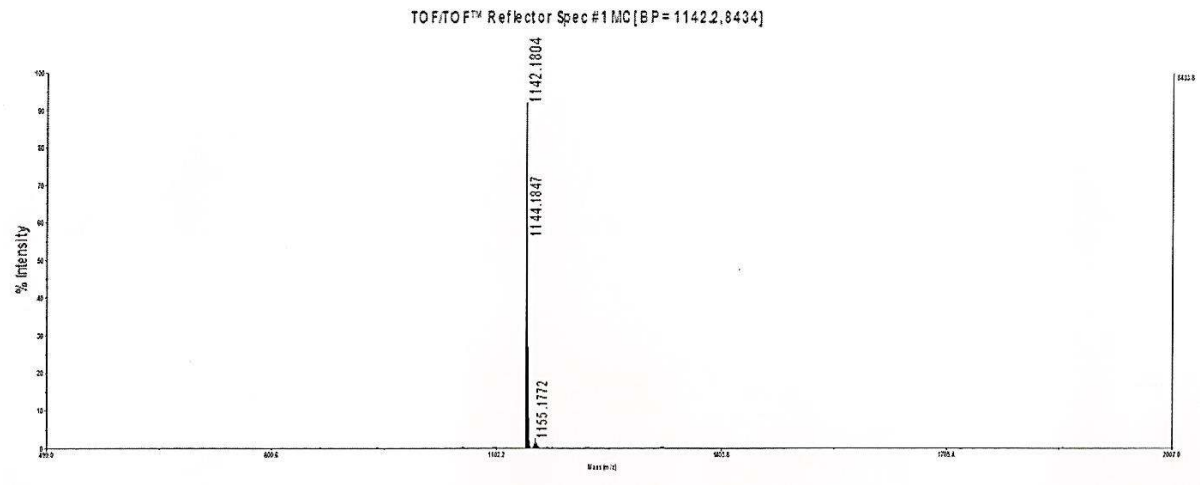

**Figure S18.** MALDI-TOF spectrum of **SGT-125**

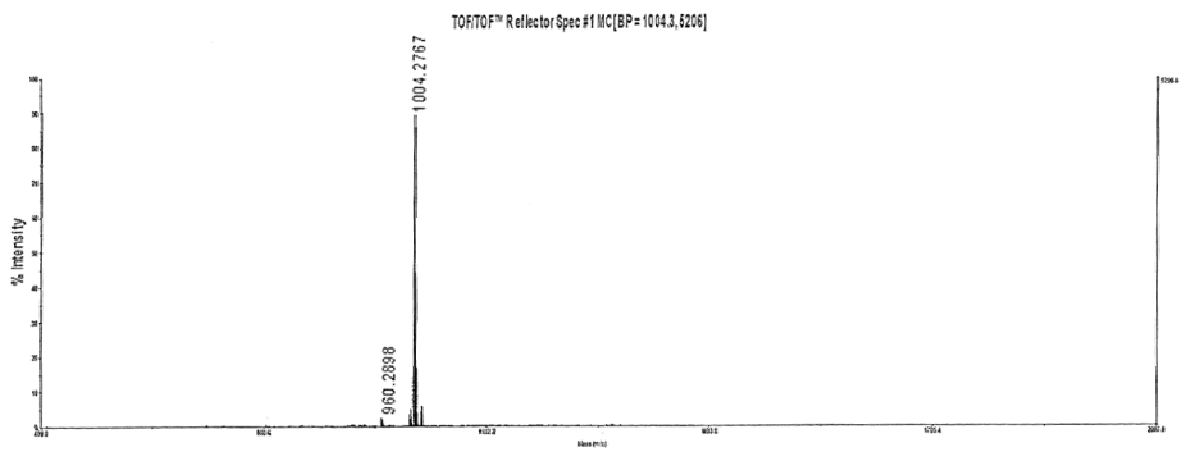

**Figure S19.** MALDI-TOF spectrum of SGT-127
